# Supplementary material
Source: Springer Nature journal article supplement (https://www.springermedizin.de/resource/supplementary/12877_2014_972_MOESM1_ESM.pdf/9440842)
Supplement: MOESM1 [file 9440842]

Patients with dementia included at

T<sub>1</sub> (n=932)

Not analyzed due to important missing information (n=2)

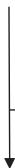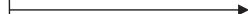

Death (n=288)

Moving to another level of care (n=12)

T<sub>2</sub> (n=632)

354 days (SD 16)

Not analyzed due to important missing information (n=8)

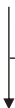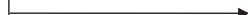

Death (n=315)

Moving to another level of care (n=9)

T<sub>3</sub> (n=308)

935 days (SD 37)

Not analyzed due to important missing information (n=12)

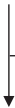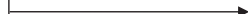

Death (n=142)

Moving to another level of care (n=5)

T<sub>4</sub> (n=160)

1580 days (SD 43)

Not analyzed due to important missing information (n=1)
